# Supplementary material for: Aged murine bone marrow myeloid and mesenchymal cells develop unique senescence phenotypes
Source: JCI journal article supplement (doi:10.1172/jci195772), 2026-01-27
Supplement: sd1 [file 1]

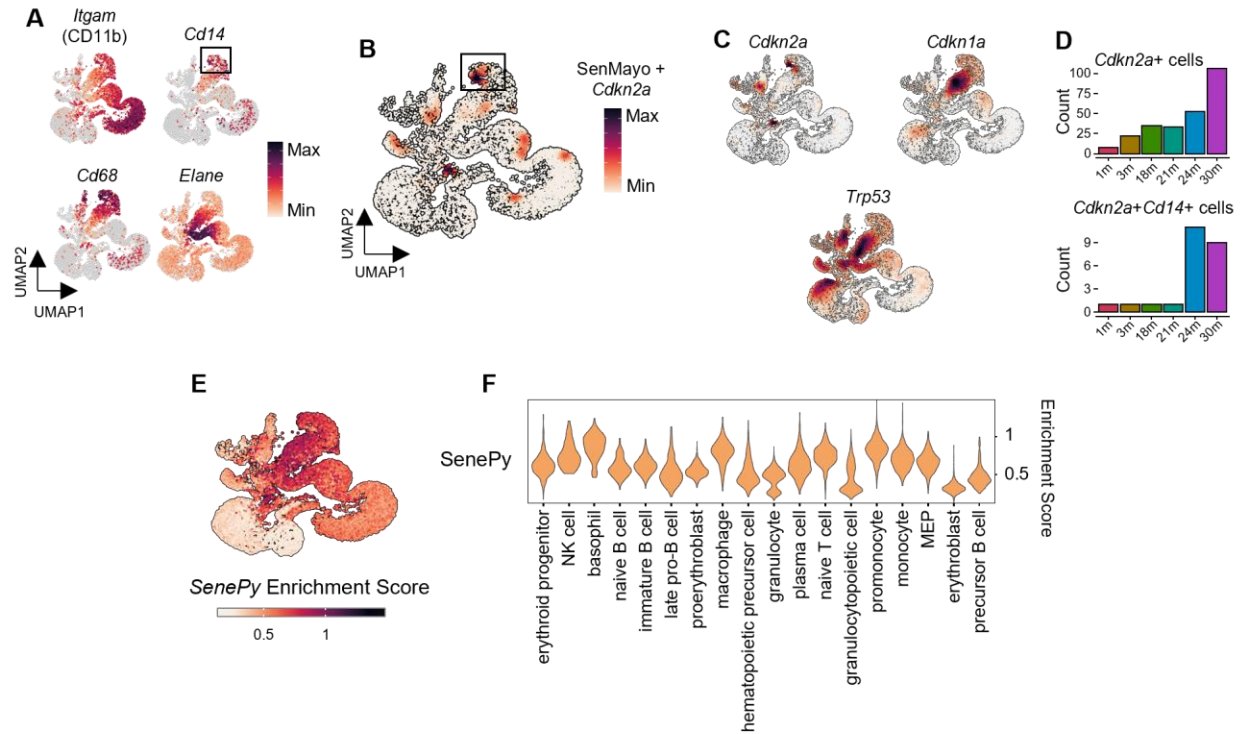

**Supplementary Figure 1. Senescence marker expression within myeloid-lineage bone marrow cells.** (A-C) Clustered bone marrow cell scRNA-seq data from the Tabula Muris Senis database, displaying only samples from 24-month (24m) and 30-month (30m) mouse cohorts, with UMAP plots demonstrating (A) individual myeloid gene expression, (B) cells jointly expressing both *SenMayo* and *Cdkn2a*, and (C) senescence-associated cyclin-dependent kinase inhibitor genes. N=8 male mice total (N=4 per age group). (D) Counts of *Cdkn2a*+ and *Cdkn2a*+*Cd14*+ bone marrow cells across the mouse lifespan. N=2-11 mice per age group. (E, F) Enrichment score using the *SenePy* (1) scoring system across bone marrow immune cell populations.

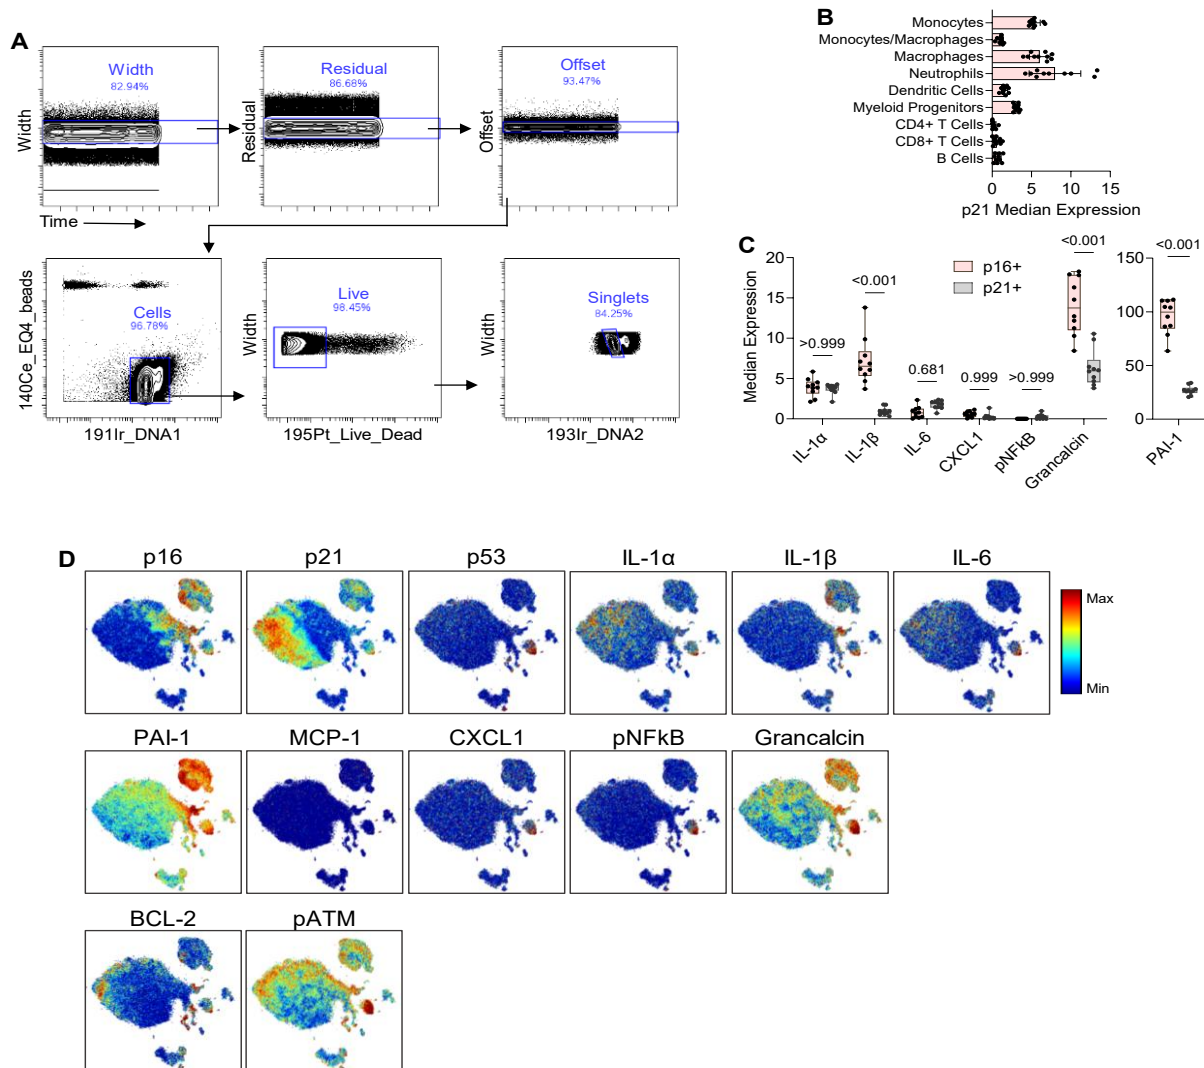

**Supplementary Figure 2. CyTOF analysis of aged bone marrow immune cells. (A)** Gating strategy for CyTOF sample pre-analysis processing. **(B)** p21 median expression levels across bone marrow immune clusters in 24-month-old wild-type C57BL/6N mice (corresponding to Figure 1E). N=10 24-month-old female mice. **(C)** SASP median expression levels between p16<sup>+</sup> or p21<sup>+</sup> bone marrow immune cells. Significance was determined by either unpaired t test or Mann Whitney test, as appropriate. **(D)** Expression plots of senescence-related proteins across all clusters (corresponding to Figure 1G).

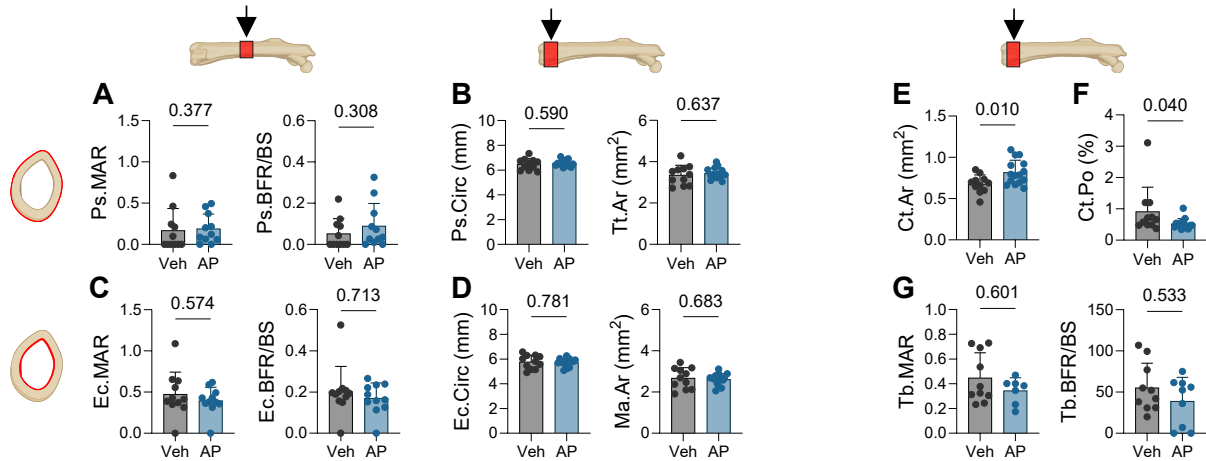

**Supplementary Figure 3. Advanced skeletal phenotyping of *LysM-LOX-ATTAC* mice.**

Periosteal and endosteal analyses at the mid-shaft diaphysis by dynamic histomorphometry (**A**, **C**) and metaphysis by microCT (**B**, **D**). (**E**, **F**) Cortical area (Ct.Ar) and porosity (Ct.Po) at the femur metaphysis. (**G**) Dynamic histomorphometry values from the metaphyseal trabecular compartment. Ps = periosteal, Ec = endosteal, Tb = trabecular, MAR = mineral apposition rate, BFR/BS = bone formation rate/bone surface, Circ = circumference, Tt.Ar = total area, Ma.Ar = medullary area. N=11 per group; Significance was determined by either unpaired t test or Mann Whitney test, as appropriate.

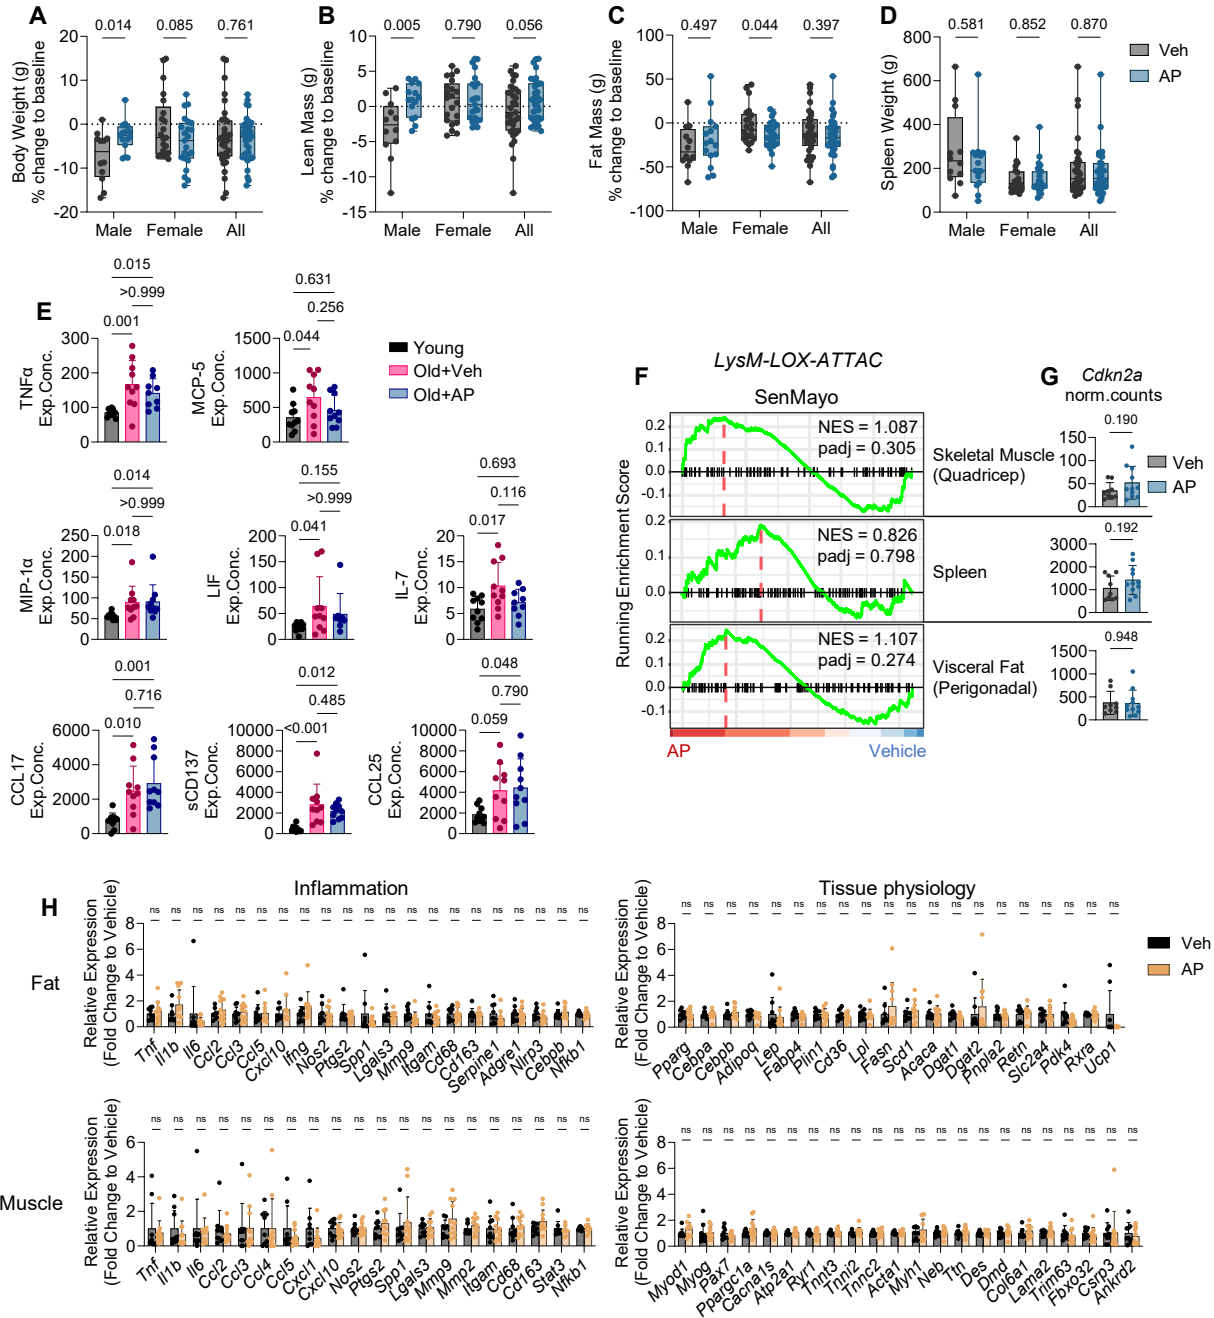

**Supplementary Figure 4. Extraskelletal phenotyping in *LysM-LOX-ATTAC* mice.** (A-D) Weight measurements of 24-month-old *LysM-LOX-ATTAC* mice, including body weight, lean mass, fat mass, and spleen weight at sacrifice, showing percent change from baseline to endpoint after 4 months of either vehicle or AP injections, stratified by sex. N=44 females (N=22 vehicle, N=22 AP) N=26 males (N=11 vehicle, N=15 AP). (E) Cytokine analysis of serum from *LysM-LOX-ATTAC* mice including untreated young mice (6-month) or old mice (24-month) treated with either vehicle or AP. N=10 per group, all males. (F) SenMayo GSEA and (G) *Cdkn2a* mRNA normalized counts in skeletal muscle (quadriceps), spleen, and visceral (perigonadal) fat tissue samples isolated from vehicle- or AP-treated *LysM-LOX-ATTAC* mice. N= 9 vehicle, N=11 AP, all male. Significance was determined by unpaired t-test or Mann Whitney test, as appropriate (A-D, H) or Kruskal-Wallis test with Dunn's multiple comparisons test (E).

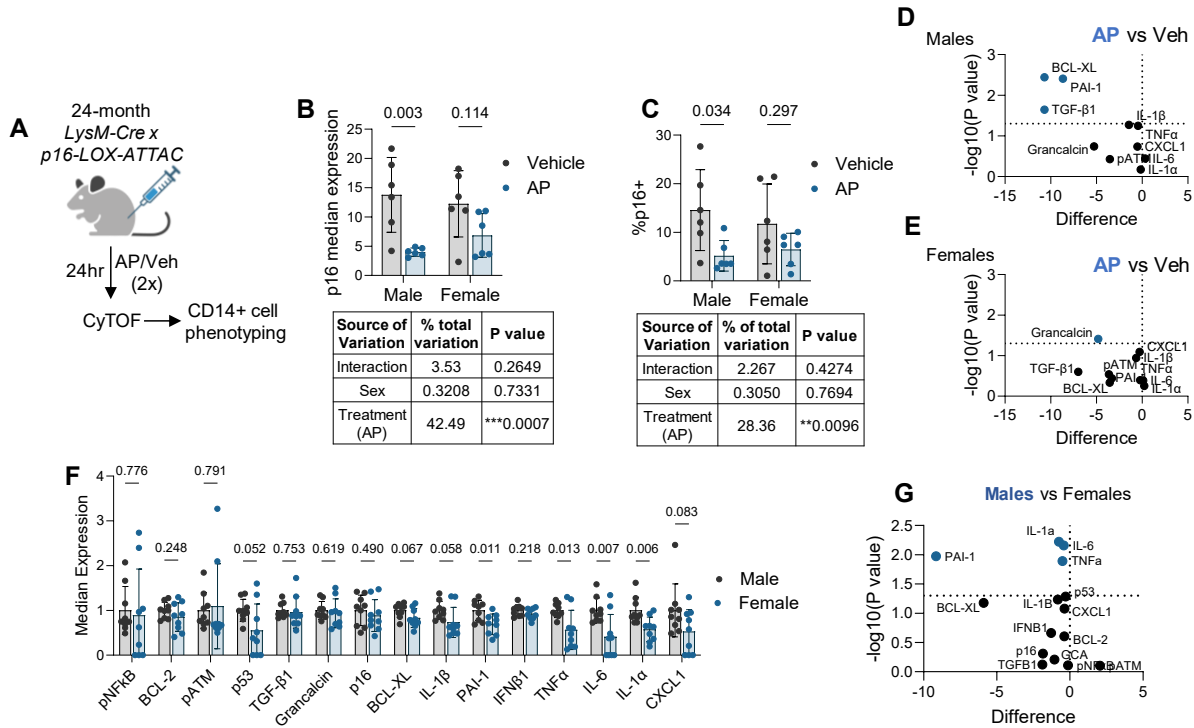

**Supplementary Figure 5. p16<sup>+</sup> myeloid cell clearance is more robust in males with a greater reduction in inflammation due to higher baseline inflammaging.** (A) Schematic for CyTOF analysis of sex differences at 24 hours post-injection of either vehicle or AP in 24-month-old *LysM-LOX-ATTAC* mice. N=12 mice per treatment (6 male, 6 female). (B, C) Bar plots and 2-way ANOVA results of p16 median expression and %p16<sup>+</sup> cells in CD14<sup>+</sup> bone marrow cells at 24 hours after vehicle or AP treatment. (D, E) Volcano plots of SASP marker differential expression between AP- versus vehicle-treated mice in males or females. (F) Bar plots and (G) volcano plot of SASP marker differential expression between wild-type male or female mice. N=9 mice per sex. Significance was determined by 2-way ANOVA with Tukey multiple comparisons test (B, C) and by either unpaired t tests or Mann Whitney tests, as appropriate (D-G).

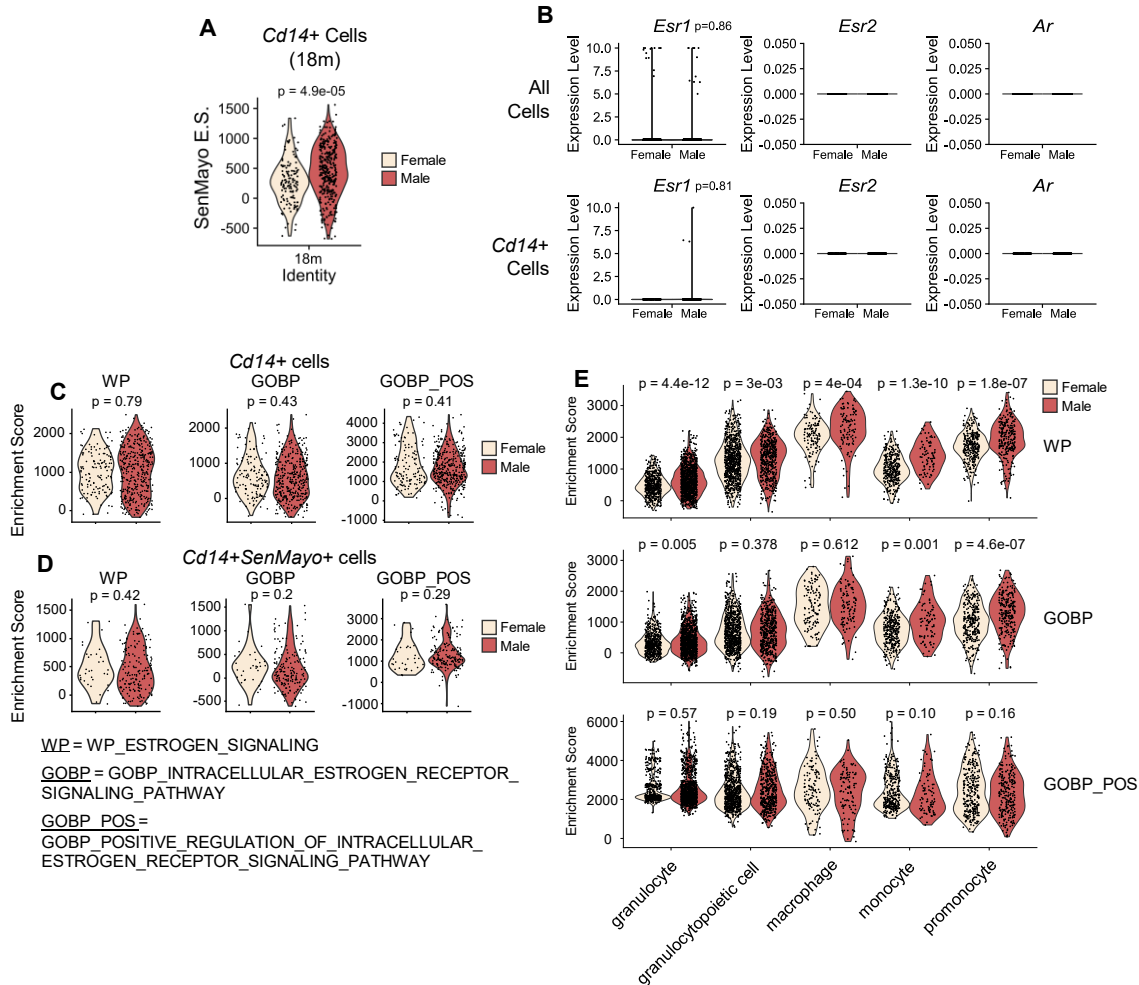

**Supplementary Figure 6. Sex hormone signaling signatures do not correlate with sex-dependent senescence burden in aged myeloid cells. (A)** SenMayo enrichment score in *Cd14+* bone marrow cells from 18-month male and female mice (Tabula Muris Senis dataset). **(B)** mRNA expression of genes encoding sex hormone receptors (*Esr1* [ER $\alpha$ ], *Esr2* [ER $\beta$ ], and *Ar* [androgen receptor]). **(C-E)** Estrogen signaling gene set enrichment score across three separate estrogen signaling gene sets in **(C)** *Cd14+*, **(D)** *Cd14+SenMayo+*, and **(E)** myeloid-lineage bone marrow immune cells. N=2 males, N=4 females. Significance was determined using the Wilcoxon rank-sum test **(A-D)**, and Kruskal-Wallis test **(E)**.

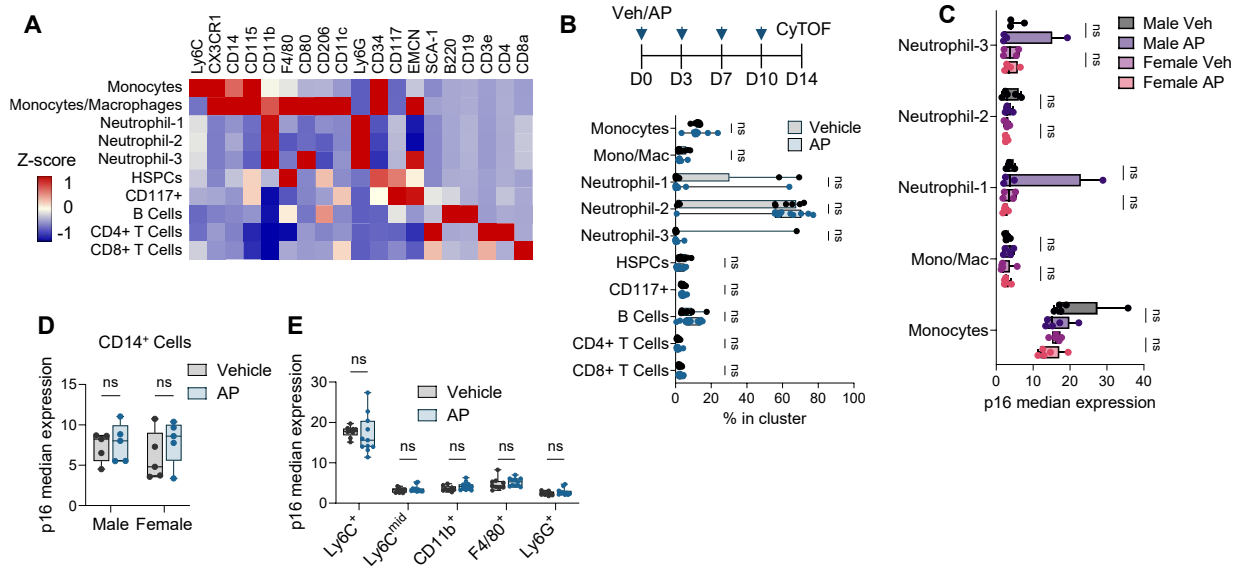

**Supplementary Figure 7. Supporting data for two-week *LysM-LOX-ATTAC* CyTOF analyses.** (A) Heatmap showing median expression of identifying markers across bone marrow immune populations from treated *LysM-LOX-ATTAC* mice analyzed by CyTOF. (B) Percentage of cells in each cell cluster from mice treated with either vehicle or AP. N=9 vehicle (4 males, 5 females), N=11 AP (5 males, 6 females). Significance was determined by either unpaired t-test or Mann Whitney test, as appropriate. (C) Sex-stratified analyses of p16 median expression between vehicle- and AP-treated mice. Significance was determined by 2-way ANOVA with Tukey multiple comparisons test. (D-E) p16 median expression in (D) CD14<sup>+</sup> cells and (E) common myeloid-lineage cell types from mice treated with either vehicle or AP for two weeks. Significance was determined by either unpaired t-test or Mann Whitney test, as appropriate.

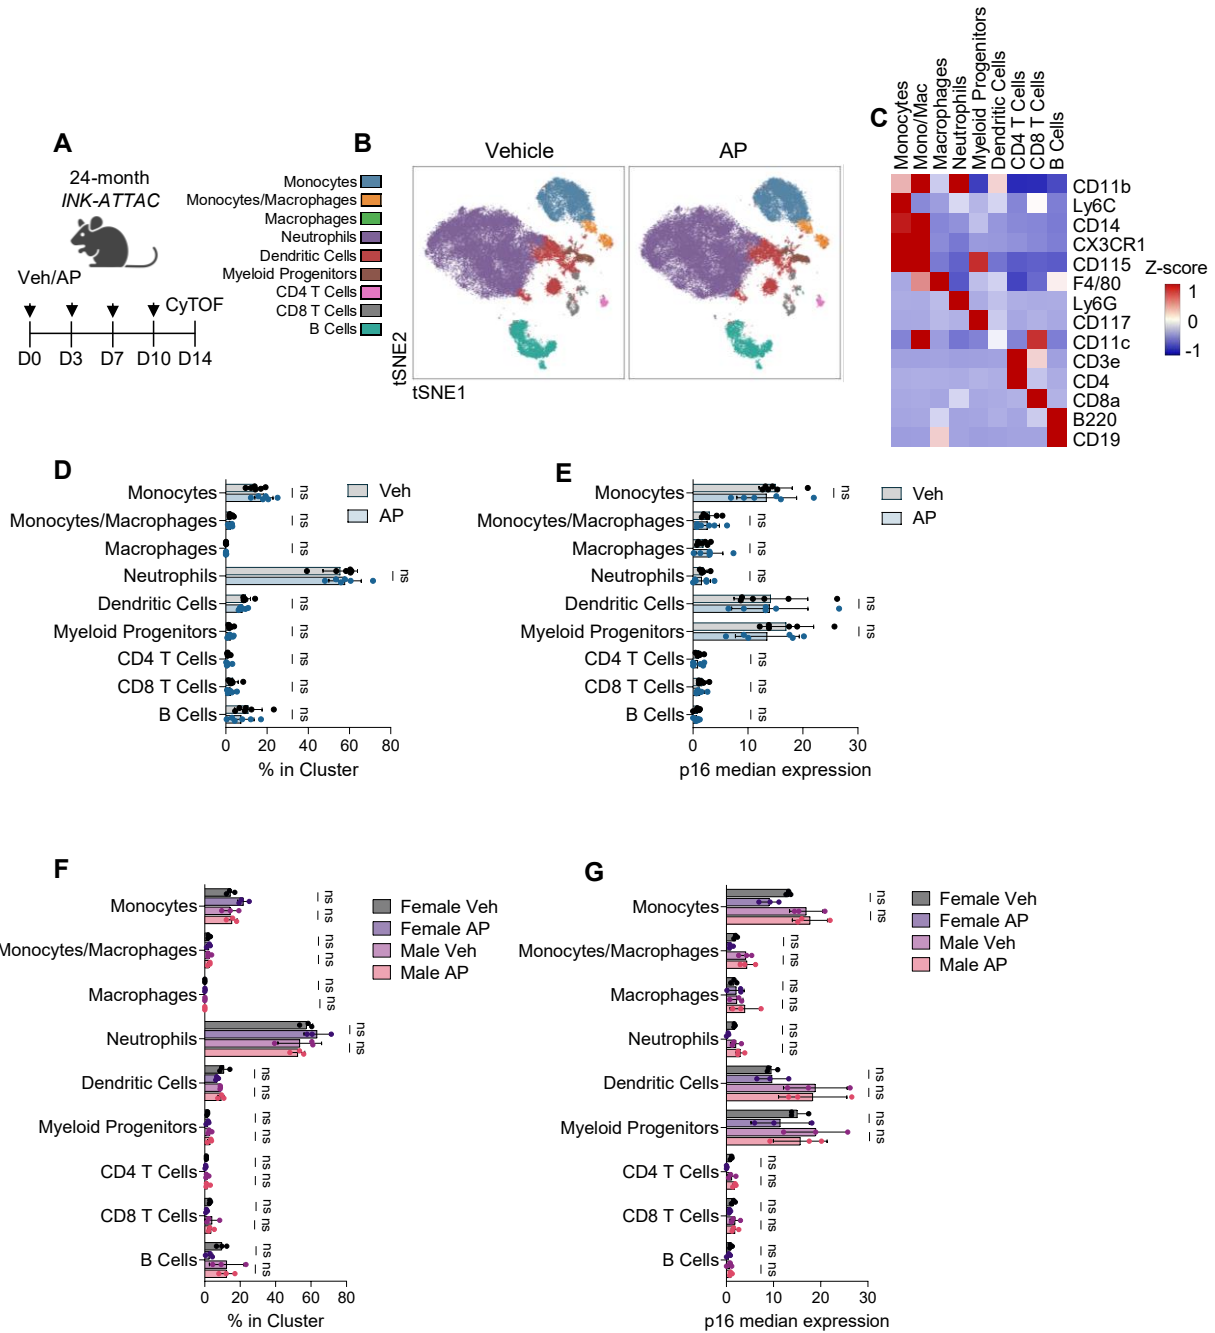

**Supplementary Figure 8. Global senolytic therapy does not lead to stable removal of p16<sup>+</sup> bone marrow immune cells.** (A) Schematic showing global clearance of p16<sup>+</sup> cells in *INK-ATTAC* mice with 2-week treatment of either vehicle or AP. N=6 mice per treatment (3 males, 3 females). (B) tSNE visualization of clustered bone marrow cells from treated *INK-ATTAC* mice. (C) Heatmap representation of median expression levels of identification markers for bone marrow immune cells. (D, E) Cell percentages and p16 median expression levels in each bone marrow immune cell population between vehicle- and AP-treated mice. Significance was determined by unpaired t-tests. (F, G) Cell percentages and p16 median expression levels in each bone marrow immune cell population between vehicle- and AP-treated mice, stratified by sex. Significance was determined by 2-way ANOVA with Tukey multiple comparisons test.

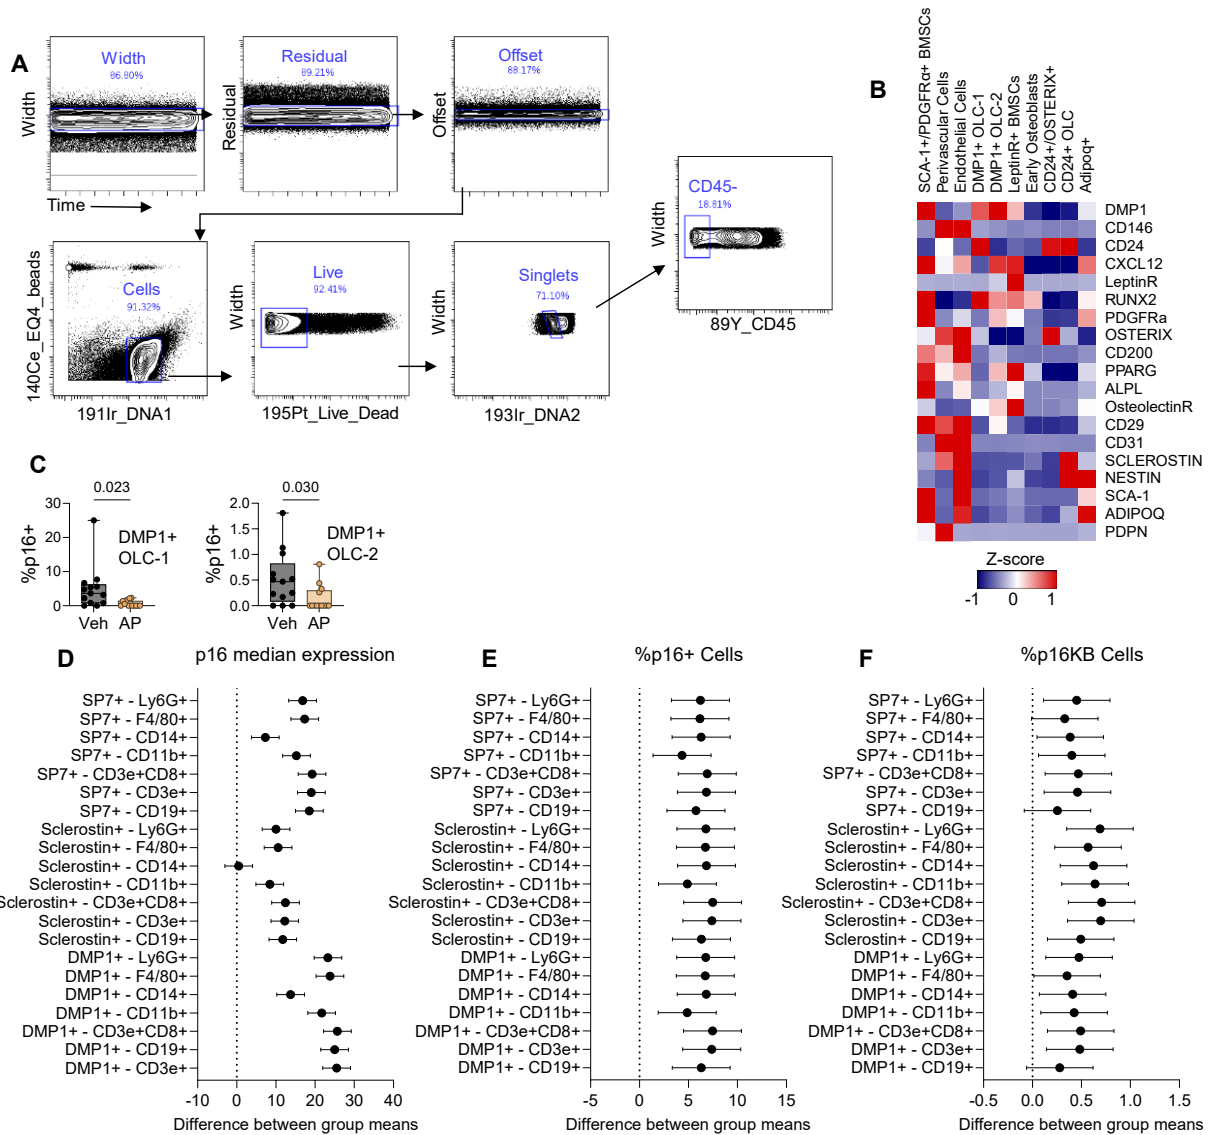

**Supplementary Figure 9: *DMP-LOX-ATTAC* CyTOF supporting data and statistical comparisons of senescence parameters between mesenchymal cells and immune cells.** (A) Gating strategy for the analysis of mesenchymal-lineage bone cells by CyTOF. (B) Heatmap showing median expression of identifying markers across mesenchymal-lineage bone cell populations from treated *DMP-LOX-ATTAC* mice analyzed by CyTOF. (C) %p16<sup>+</sup> cells in DMP1<sup>+</sup> osteolineage (OLC) clusters. N=13 per group. Significance was determined by unpaired t test. (D-F) One-way ANOVA results on corresponding data from Figure 5I-K showing differences in group means of osteolineage cells versus various immune cell types of (D) p16 median expression, (E) %p16<sup>+</sup> cells, and (F) %p16KB cells between mesenchymal and immune populations. Error bars are 95% confidence intervals. N=18 mice total (9 males, 9 females).

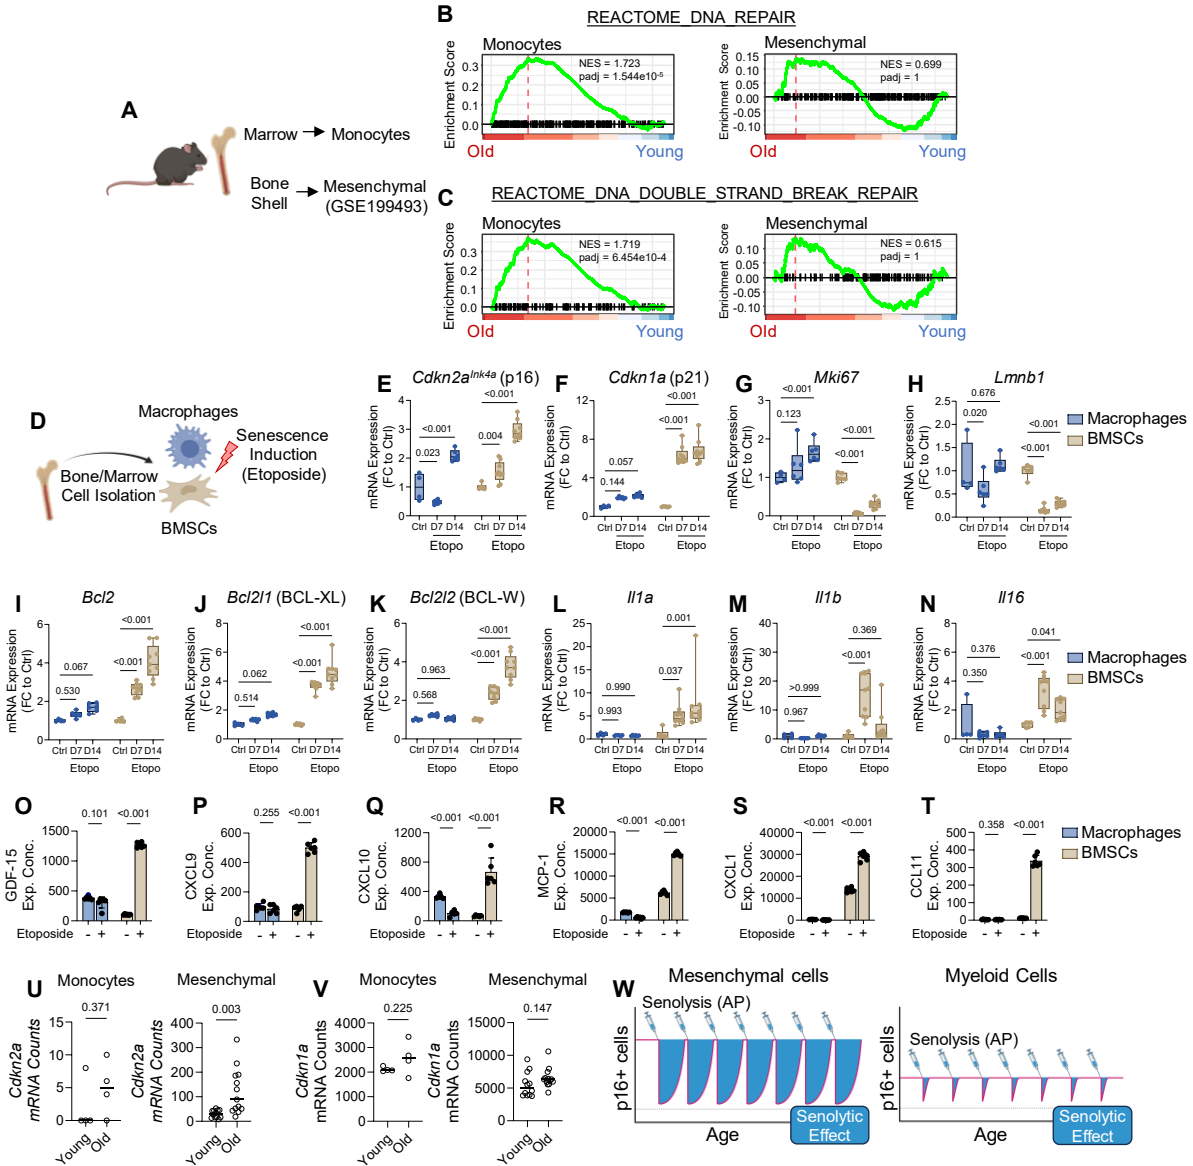

**Supplementary Figure 10: Senescence markers are expressed in unique patterns between mesenchymal- and myeloid-lineage cells.** (A) Freshly-isolated bone marrow monocytes from young (6-month) and old (24-month) mice (N=4 per age) and age-matched mesenchymal-enriched diaphysis bone samples from previous work (N=12-13 per age) (2) (GSE199493). (B, C) GSEA plots of DNA repair and DNA double strand break repair gene sets in monocyte and mesenchymal samples. (D-N) qPCR results from senescence induction experiments, demonstrating relative mRNA levels of senescence-associated genes. N=4-9 per time point. Significance was determined by 2-way ANOVA with Tukey multiple comparisons test. (O-T) Quantification of cytokine array from conditioned media from control or D14 etoposide-treated macrophages or BMSCs. N=6 per group. Significance was determined by multiple t-tests with Holm-Sidak correction. (U) *Cdkn2a* and (V) *Cdkn1a* mRNA counts from freshly-isolated CD14+ monocytes and mesenchymal-enriched bone diaphysis samples (GSE199493); line at median. Significance was determined by unpaired t-test (W) Summarized schematic of findings, indicating a larger senolytic effect from targeting mesenchymal p16+ cells (rather than myeloid p16+ cells) due to their higher expression of senescence markers and longer period of removal after senolysis.

**Supplementary Table 1. CyTOF Antibody Panels.***Immune Senescence Phenotyping (Figure 1)*

| <b>Marker</b> | <b>Metal</b> | <b>Vendor</b>     | <b>Cat#</b>    |
|---------------|--------------|-------------------|----------------|
| CD45          | 89Y          | Standard BioTools | 3089005B       |
| CD4           | 145Nd        | Biolegend         | 100506         |
| CD34          | 163Dy        | Thermo Fisher     | MA5-17826      |
| CD11c         | 142Nd        | Biolegend         | 117310         |
| CD8a          | 168Er        | Biolegend         | 100702         |
| CD117         | 173Yb        | Standard BioTools | 3173004B       |
| CD3e          | 152Sm        | Biolegend         | 100302         |
| CD19          | 166Er        | Biolegend         | 115502         |
| pNFkB         | 110Cd        | Cell Signaling    | 3033           |
| BCL-2         | 112Cd        | Biolegend         | 633502         |
| pATM          | 114Cd        | Abcam             | ab217838       |
| p53           | 116Cd        | Abcam             | ab252388       |
| MCP-1         | 149Sm        | Thermo Fisher     | MA5-17040      |
| p16           | 155Gd        | Abcam             | ab232402       |
| IL-1B         | 159Tb        | Cell Signaling    | 31202          |
| PAI-1         | 160Gd        | Abcam             | ab125687       |
| IL-6          | 167Er        | Standard BioTools | 3167003B       |
| SCA-1         | 169Tm        | Standard BioTools | 3169015B       |
| IL-1a         | 171Yb        | Biolegend         | 503202         |
| CXCL1         | 175Lu        | R&D Systems       | MAB453-500     |
| p21           | 176Yb        | Santa Cruz        | sc-6246        |
| CD11b         | 111Cd        | Biolegend         | 101201         |
| CCR2          | 156Gd        | Novus Biologicals | MAB55381-100   |
| F4/80         | 113Cd        | Biolegend         | 123101         |
| Ly6C          | 141Pr        | Biolegend         | 128039         |
| CD28          | 143Nd        | Biolegend         | 102101         |
| Grancalcin    | 146Nd        | Bosterbio         | A01237         |
| CTSK          | 147Sm        | Abcam             | ab37259        |
| CD80          | 148Nd        | Biolegend         | 104735         |
| Granzyme K    | 150Nd        | LSBio             | LS-C176975-100 |
| CD206         | 151Eu        | Biolegend         | 141702         |
| B220          | 153Eu        | Biolegend         | 103249         |
| CD265         | 154Sm        | ThermoFisher      | 14-6612-82     |
| Catalase      | 158Gd        | Abcam             | ab223793       |
| CX3CR1        | 161Dy        | Biolegend         | 149002         |
| EMCN          | 164Dy        | ThermoFisher      | 14-5851-82     |
| CD14          | 165Ho        | Biolegend         | 123321         |
| Ly6G          | 170Er        | Biolegend         | 127637         |
| CD115         | 174Yb        | Biolegend         | 135502         |

LysM-LOX-ATTAC CyTOF (Figure 3)

| <b>Marker</b> | <b>Metal</b> | <b>Vendor</b>     | <b>Cat#</b>    |
|---------------|--------------|-------------------|----------------|
| CD45          | 89Y          | Standard BioTools | 3089005B       |
| CD4           | 145Nd        | Biolegend         | 100506         |
| CD34          | 163Dy        | Thermo Fisher     | MA5-17826      |
| CD11c         | 142Nd        | Biolegend         | 117310         |
| CD8a          | 168Er        | Biolegend         | 100702         |
| CD117         | 173Yb        | Standard BioTools | 3173004B       |
| CD3e          | 152Sm        | Biolegend         | 100302         |
| CD19          | 166Er        | Biolegend         | 115502         |
| Ki67          | 106Cd        | Standard BioTools | 3168007B       |
| pNFkB         | 110Cd        | Cell Signaling    | 3033           |
| BCL-2         | 112Cd        | Biolegend         | 633502         |
| pATM          | 114Cd        | Abcam             | ab217838       |
| p53           | 116Cd        | Abcam             | ab252388       |
| MCP-1         | 149Sm        | Thermo Fisher     | MA5-17040      |
| p16           | 155Gd        | Abcam             | ab232402       |
| IL-1B         | 159Tb        | Cell Signaling    | 31202          |
| PAI-1         | 160Gd        | Abcam             | ab125687       |
| IL-6          | 167Er        | Standard BioTools | 3167003B       |
| SCA-1         | 169Tm        | Standard BioTools | 3169015B       |
| IL-1a         | 171Yb        | Biolegend         | 503202         |
| CXCL1         | 175Lu        | R&D Systems       | MAB453-500     |
| p21           | 176Yb        | Santa Cruz        | sc-6246        |
| CD11b         | 111Cd        | Biolegend         | 101201         |
| CCR2          | 156Gd        | Novus Biologicals | MAB55381-100   |
| F4/80         | 113Cd        | Biolegend         | 123101         |
| Ly6C          | 141Pr        | Biolegend         | 128039         |
| CD28          | 143Nd        | Biolegend         | 102101         |
| Grancalcin    | 146Nd        | Bosterbio         | A01237         |
| CTSK          | 147Sm        | Abcam             | ab37259        |
| CD80          | 148Nd        | Biolegend         | 104735         |
| Granzyme K    | 150Nd        | LSBio             | LS-C176975-100 |
| CD206         | 151Eu        | Biolegend         | 141702         |
| B220          | 153Eu        | Biolegend         | 103249         |
| CD265         | 154Sm        | ThermoFisher      | 14-6612-82     |
| Catalase      | 158Gd        | Abcam             | ab223793       |
| CX3CR1        | 161Dy        | Biolegend         | 149002         |
| EMCN          | 164Dy        | ThermoFisher      | 14-5851-82     |
| CD14          | 165Ho        | Biolegend         | 123321         |
| Ly6G          | 170Er        | Biolegend         | 127637         |
| CD115         | 174Yb        | Biolegend         | 135502         |
| TGF-B1        | 144Nd        | Novus Biologicals | NBP2-74495     |

*DMP-LOX-ATTAC (Figure 3)*

| <b>Marker</b>         | <b>Metal</b> | <b>Vendor</b>     | <b>Cat#</b> |
|-----------------------|--------------|-------------------|-------------|
| CD45                  | 89Y          | Standard BioTools | 3089005B    |
| CD140a/PDGFR $\alpha$ | 148Nd        | BioLegend         | 135902      |
| Ki67                  | 106Cd        | Biolegend         | 350523      |
| pNFkB                 | 110Cd        | Cell Signaling    | 3033        |
| OCN                   | 111Cd        | Santa Cruz        | sc-376835   |
| BCL-2                 | 112Cd        | Biolegend         | 633502      |
| pATM                  | 114Cd        | Abcam             | ab217838    |
| p53                   | 116Cd        | Abcam             | ab252388    |
| CD146                 | 141Pr        | Standard BioTools | 3141016B    |
| CD24                  | 142Nd        | Biolegend         | 101802      |
| DMP-1                 | 143Nd        | ThermoFisher      | PA5-47621   |
| CXCL12                | 144Nd        | R&D Systems       | MAB350-100  |
| CENP-B                | 145Nd        | Santa Cruz        | sc-376283   |
| LeptinR               | 146Nd        | R&D Systems       | AF497       |
| Runx2                 | 147Sm        | Abcam             | ab76956     |
| MCP-1                 | 149Sm        | Thermo Fisher     | MA5-17040   |
| Osterix               | 151Eu        | Invitrogen        | PA5-40411   |
| CD200                 | 152Sm        | Biolegend         | 123802      |
| PPAR $\gamma$         | 153Eu        | Invitrogen        | PA3-821A    |
| ALPL                  | 154Sm        | R&D Systems       | af2910      |
| p16                   | 155Gd        | Abcam             | ab232402    |
| Itga11                | 156Gd        | Abcam             | ab198826    |
| CD29                  | 158Gd        | Biolegend         | 102235      |
| IL-1B                 | 159Tb        | Cell Signaling    | 31202       |
| PAI-1                 | 160Gd        | Abcam             | ab125687    |
| TNF $\alpha$          | 162Dy        | Standard BioTools | 3162002B    |
| FLAG                  | 164Dy        | Biolegend         | 637301      |
| CD31                  | 165Ho        | Standard BioTools | 3165013B    |
| Sclerostin            | 166Er        | Abcam             | ab63097     |
| IL-6                  | 167Er        | Standard BioTools | 3167003B    |
| Nestin                | 168Er        | Biolegend         | 655102      |
| SCA-1                 | 169Tm        | Standard BioTools | 3169015B    |
| Adiponectin           | 170Er        | Invitrogen        | PA1-84881   |
| IL-1a                 | 171Yb        | Biolegend         | 503202      |
| yH2A-X                | 173Yb        | BD Biosciences    | 560443      |
| PDPN                  | 174Yb        | BioLegend         | 127401      |
| CXCL1                 | 175Lu        | R&D Systems       | MAB453-500  |
| p21                   | 176Yb        | Santa Cruz        | sc-6246     |

*Mesenchymal vs Immune Senescence Phenotyping – Immune Panel (Figure 4)*

| <b>Marker</b> | <b>Metal</b> | <b>Vendor</b>     | <b>Cat#</b> |
|---------------|--------------|-------------------|-------------|
| CD45          | 89Y          | Standard BioTools | 3089005B    |
| CD34          | 163Dy        | Thermo Fisher     | MA5-17826   |
| CD8a          | 168Er        | Biologend         | 100702      |
| CD11c         | 209Bi        | Biologend         | 117310      |
| CD3e          | 152Sm        | Biologend         | 100302      |
| CD19          | 166Er        | Biologend         | 115502      |
| Ki67          | 106Cd        | Standard BioTools | 3168007B    |
| pNFkB         | 110Cd        | Cell Signaling    | 3033        |
| pATM          | 114Cd        | Abcam             | ab217838    |
| p53           | 116Cd        | Abcam             | ab252388    |
| p16           | 155Gd        | Abcam             | ab232402    |
| TNFa          | 162Dy        | Standard BioTools | 3162002B    |
| IL-6          | 167Er        | Standard BioTools | 3167003B    |
| CXCL1         | 175Lu        | R&D Systems       | MAB453-500  |
| p21           | 176Yb        | Santa Cruz        | sc-6246     |
| CD11b         | 111Cd        | Biologend         | 101201      |
| CD28          | 143Nd        | Biologend         | 102101      |
| Grancalcin    | 146Nd        | Bosterbio         | A01237      |
| CD80          | 148Nd        | Biologend         | 104735      |
| CD206         | 151Eu        | Biologend         | 141702      |
| Ly6G          | 170Er        | Biologend         | 127637      |
| CD115         | 174Yb        | Biologend         | 135502      |
| BCL-2         | 112Cd        | Biologend         | 633502      |
| IL-1B         | 159Tb        | Cell Signaling    | 31202       |
| SCA-1         | 169Tm        | Standard BioTools | 3169015B    |
| IL-1a         | 171Yb        | Biologend         | 503202      |
| TGF-B1        | 144Nd        | Novus Biologicals | NBP2-74495  |
| Survivin      | 145Nd        | ThermoFisher      | MA5-15077   |
| LaminB1       | 150Nd        | Abcam             | ab239399    |
| BCL-XL        | 156Gd        | Abcam             | ab32370     |
| PAI-1         | 160Gd        | Abcam             | ab125687    |
| IFNB1         | 161Dy        | Biologend         | 508102      |
| p38-MAPK      | 164Dy        | ThermoFisher      | MA5-15182   |
| Ly6C          | 198Pt        | Biologend         | 128039      |
| F4/80         | 113Cd        | Biologend         | 123101      |
| CD4           | 141Pr        | Biologend         | 100506      |
| CXCR4         | 142Nd        | Biologend         | 146502      |
| CTSK          | 147Sm        | Abcam             | ab37259     |
| CD117         | 153Eu        | Standard BioTools | 3173004B    |
| CD14          | 154Sm        | Biologend         | 123321      |
| CD62L         | 158Gd        | Biologend         | 104402      |
| CCR5          | 165Ho        | BD Biosciences    | 559921      |

*Mes vs Imm Senescence Phenotyping – Mesenchymal Panel (Figure 4)*

| <b>Marker</b>         | <b>Metal</b> | <b>Vendor</b>     | <b>Cat#</b> |
|-----------------------|--------------|-------------------|-------------|
| CD45                  | 89Y          | Standard BioTools | 3089005B    |
| CD31                  | 163Dy        | Standard BioTools | 3165013B    |
| TNF $\alpha$          | 162Dy        | Standard BioTools | 3162002B    |
| IL-6                  | 167Er        | Standard BioTools | 3167003B    |
| pNF $\kappa$ B        | 110Cd        | Cell Signaling    | 3033        |
| BCL-2                 | 112Cd        | Biologend         | 633502      |
| pATM                  | 114Cd        | Abcam             | ab217838    |
| p53                   | 116Cd        | Abcam             | ab252388    |
| Grancalcin            | 146Nd        | Bosterbio         | A01237      |
| p16                   | 155Gd        | Abcam             | ab232402    |
| PAI-1                 | 160Gd        | Abcam             | ab125687    |
| CXCL1                 | 175Lu        | R&D Systems       | MAB453-500  |
| p21                   | 176Yb        | Santa Cruz        | sc-6246     |
| Ki67                  | 106Cd        | Standard BioTools | 3168007B    |
| TGF-B1                | 144Nd        | Novus Biologicals | NBP2-74495  |
| Survivin              | 145Nd        | ThermoFisher      | MA5-15077   |
| LaminB1               | 150Nd        | Abcam             | ab239399    |
| IFN $\beta$ 1         | 161Dy        | Biologend         | 508102      |
| p38-MAPK              | 164Dy        | ThermoFisher      | MA5-15182   |
| CD146                 | 141Pr        | Standard BioTools | 3141016B    |
| LeptinR               | 113Cd        | R&D Systems       | AF497       |
| Nestin                | 168Er        | Biologend         | 655102      |
| SCA-1                 | 169Tm        | Standard BioTools | 3169015B    |
| CD24                  | 142Nd        | Biologend         | 101802      |
| CD140a/PDGFR $\alpha$ | 148Nd        | BioLegend         | 135902      |
| CXCL12                | 174Yb        | R&D Systems       | MAB350-100  |
| CD200                 | 152Sm        | Biologend         | 123802      |
| CD29                  | 158Gd        | Biologend         | 102235      |
| TRAF3                 | 165Ho        | Santa Cruz        | sc-6933     |
| CCL5                  | 172Yb        | Santa Cruz        | sc-373984   |
| Runx2                 | 147Sm        | Abcam             | ab76956     |
| Osterix               | 151Eu        | Invitrogen        | PA5-40411   |
| ALPL                  | 154Sm        | R&D Systems       | af2910      |
| OCN                   | 111Cd        | Santa Cruz        | sc-376835   |
| DMP-1                 | 143Nd        | ThermoFisher      | PA5-47621   |
| Sclerostin            | 166Er        | Abcam             | ab63097     |
| PPAR $\gamma$         | 153Eu        | Invitrogen        | PA3-821A    |
| Adiponectin           | 170Er        | Invitrogen        | PA1-84881   |
| IL-1 $\alpha$         | 171Yb        | Biologend         | 503202      |
| IL-1 $\beta$          | 159Tb        | Cell Signaling    | 31202       |
| BCL-XL                | 156Gd        | Abcam             | ab32370     |

**Supplementary Table 2. qPCR Primer Sequences.**

| <b>Gene</b>                    | <b>Forward Primer sequence (5'-3')</b> | <b>Reverse Primer Sequence (5'-3')</b> |
|--------------------------------|----------------------------------------|----------------------------------------|
| <i>Cdkn2a</i> <sup>INK4a</sup> | GAACTCTTTCGGTCGTACCC                   | AGTTCGAATCTGCACCGTAGT                  |
| <i>Cdkn1a</i>                  | GAACATCTCAGGGCCGAAAA                   | TGCGCTTGGAGTGATAGAAATC                 |
| <i>Bcl2</i>                    | CGGGAGATCGTGATGAAGTACA                 | ATCTCCAGCATCCCACCTCGTA                 |
| <i>Bcl2l1</i>                  | AGGCCCCAGAAGAAACTGAAG                  | AGGATGGGTTGCCATTGATG                   |
| <i>Bcl2l2</i>                  | CCCTGTGTGCTGAGAGTGTCA                  | CCATCCAATCCTGCACTTGTC                  |
| <i>Laminb1</i>                 | TCTCCTCACAGCTCTCTAAC                   | CTCCAATTCCTGGATCCTTTC                  |
| <i>Il1a</i>                    | AAGAGACCATCCAACCCAGATC                 | CCTGACGAGCTTCATCAGTTTG                 |
| <i>Il1b</i>                    | TCAGGCAGGCAGTATCACTCA                  | CACGGGAAAGACACAGGTAGCT                 |
| <i>Il6</i>                     | ACCACGGCCTTCCCTACTTC                   | TTGGGAGTGGTATCCTCTGTGA                 |
| <i>Mki67</i>                   | AGACTGCCTCCCAGGAGACA                   | GGCCCCGAGATGTAGATTTCT                  |
| <i>Actb</i>                    | AATCGTGCGTGACATCAAAGAG                 | GCCATCTCCTGCTCGAAGTC                   |
| <i>Tuba1a</i>                  | GGTTCCCAAAGATGTCAATGCT                 | CAAACCTGGATGGTACGCTTGGT                |

**Supplementary Table 3. Anti-Apoptotic Gene Set.**

| <b>Term</b>    | <b>Gene</b> |
|----------------|-------------|
| ANTI_APOPTOSIS | Bcl2        |
| ANTI_APOPTOSIS | Bcl2l1      |
| ANTI_APOPTOSIS | Bcl2l2      |
| ANTI_APOPTOSIS | Mcl1        |
| ANTI_APOPTOSIS | Cflar       |
| ANTI_APOPTOSIS | Gadd45a     |
| ANTI_APOPTOSIS | Naip1       |
| ANTI_APOPTOSIS | Naip2       |
| ANTI_APOPTOSIS | Naip3       |
| ANTI_APOPTOSIS | Naip4       |
| ANTI_APOPTOSIS | Naip5       |
| ANTI_APOPTOSIS | Naip6       |
| ANTI_APOPTOSIS | Birc2       |
| ANTI_APOPTOSIS | Birc3       |
| ANTI_APOPTOSIS | Xiap        |
| ANTI_APOPTOSIS | Birc6       |
| ANTI_APOPTOSIS | Birc7       |

**Supplementary Table 4. Upstream Regulator Analysis results of RNA-seq data from etoposide-treated BMSCs and macrophages.**

| Cell Type   | Upstream Regulator       | Molecule Type                     | Predicted Activation State | Activation z-score | p-value of overlap |
|-------------|--------------------------|-----------------------------------|----------------------------|--------------------|--------------------|
| Macrophages | daidzein                 | chemical drug                     | Activated                  | 2.607              | 5.04E-07           |
| Macrophages | THRB                     | ligand-dependent nuclear receptor | Activated                  | 2.425              | 3.79E-03           |
| Macrophages | PKD1                     | ion channel                       | Activated                  | 2.236              | 7.27E-03           |
| Macrophages | SU6656                   | chemical toxicant                 | Activated                  | 2.236              | 8.95E-07           |
| Macrophages | trans-hydroxytamoxifen   | chemical drug                     | Activated                  | 2.236              | 1.82E-03           |
| Macrophages | COL18A1                  | other                             | Activated                  | 2.219              | 6.98E-05           |
| Macrophages | CFTR                     | ion channel                       | Activated                  | 2.219              | 7.52E-07           |
| Macrophages | N-Ac-Leu-Leu-norleucinal | chemical - protease inhibitor     | Activated                  | 2.201              | 4.44E-05           |
| Macrophages | PSMB11                   | peptidase                         | Activated                  | 2.121              | 1.53E-07           |
| Macrophages | KLF3                     | transcription regulator           | Activated                  | 2.121              | 3.64E-04           |
| Macrophages | U0126                    | chemical drug                     | Activated                  | 2.104              | 4.36E-08           |
| Macrophages | SHC1                     | other                             | Activated                  | 2.085              | 2.87E-05           |
| Macrophages | YY1                      | transcription regulator           | Activated                  | 2.008              | 2.62E-08           |
| Macrophages | PDCD10                   | other                             | Activated                  | 2                  | 1.13E-06           |
| Macrophages | CDCA8                    | other                             | Activated                  | 2                  | 6.26E-04           |
| Macrophages | LAPTM5                   | other                             | Activated                  | 2                  | 1.98E-04           |
| Macrophages | SSTR2                    | G-protein coupled receptor        | Activated                  | 2                  | 1.39E-06           |
| Macrophages | TWF1                     | kinase                            | Activated                  | 2                  | 4.68E-04           |
| Macrophages | baicalein                | chemical drug                     | Activated                  | 2                  | 8.55E-04           |
| Macrophages | OLFM4-RET                | fusion gene/product               | Inhibited                  | -2                 | 8.92E-04           |
| Macrophages | COP1                     | enzyme                            | Inhibited                  | -2                 | 6.26E-04           |
| Macrophages | NANOG                    | transcription regulator           | Inhibited                  | -2                 | 1.03E-02           |
| Macrophages | CD83                     | transmembrane receptor            | Inhibited                  | -2                 | 1.62E-05           |
| Macrophages | APEX1                    | enzyme                            | Inhibited                  | -2                 | 2.08E-05           |
| Macrophages | CREB (family)            | group                             | Inhibited                  | -2.069             | 5.02E-04           |
| Macrophages | pirinixic acid           | chemical toxicant                 | Inhibited                  | -2.079             | 2.60E-06           |
| Macrophages | RAS (family)             | group                             | Inhibited                  | -2.097             | 4.70E-06           |
| Macrophages | F2                       | peptidase                         | Inhibited                  | -2.098             | 1.39E-07           |
| Macrophages | lipopolysaccharide       | chemical drug                     | Inhibited                  | -2.1               | 1.45E-15           |
| Macrophages | INSULIN (family)         | group                             | Inhibited                  | -2.126             | 1.95E-05           |
| Macrophages | IL5                      | cytokine                          | Inhibited                  | -2.157             | 1.23E-05           |
| Macrophages | IL7                      | cytokine                          | Inhibited                  | -2.169             | 8.70E-05           |
| Macrophages | quinolinic acid          | chemical - endogenous             | Inhibited                  | -2.174             | 3.37E-06           |

|             |                                 |                                            |           |        |          |
|-------------|---------------------------------|--------------------------------------------|-----------|--------|----------|
|             |                                 | mammalian                                  |           |        |          |
| Macrophages | MAPK3                           | kinase                                     | Inhibited | -2.176 | 1.60E-04 |
| Macrophages | bicuculline                     | chemical -<br>endogenous non-<br>mammalian | Inhibited | -2.183 | 1.03E-05 |
| Macrophages | TRIM28                          | transcription<br>regulator                 | Inhibited | -2.186 | 1.31E-03 |
| Macrophages | 5-azacytidine                   | chemical drug                              | Inhibited | -2.195 | 3.31E-03 |
| Macrophages | CD38                            | enzyme                                     | Inhibited | -2.2   | 1.53E-03 |
| Macrophages | SPHK1                           | kinase                                     | Inhibited | -2.202 | 8.68E-06 |
| Macrophages | nitric oxide                    | chemical -<br>endogenous<br>mammalian      | Inhibited | -2.202 | 1.62E-04 |
| Macrophages | CASR                            | G-protein coupled<br>receptor              | Inhibited | -2.219 | 5.23E-04 |
| Macrophages | GNAQ                            | enzyme                                     | Inhibited | -2.226 | 1.40E-05 |
| Macrophages | CREBBP                          | transcription<br>regulator                 | Inhibited | -2.233 | 9.79E-07 |
| Macrophages | isobutylmethylxanthin<br>e      | chemical toxicant                          | Inhibited | -2.236 | 1.13E-05 |
| Macrophages | TICAM1                          | other                                      | Inhibited | -2.388 | 3.34E-09 |
| Macrophages | tetradecanoylphorbol<br>acetate | chemical drug                              | Inhibited | -2.457 | 4.37E-12 |
| Macrophages | ESR2                            | ligand-dependent<br>nuclear receptor       | Inhibited | -2.458 | 1.40E-05 |
| Macrophages | CG (complex)                    | complex                                    | Inhibited | -2.525 | 2.54E-09 |
| Macrophages | IGF1                            | growth factor                              | Inhibited | -2.648 | 1.89E-06 |
| Macrophages | IFNG                            | cytokine                                   | Inhibited | -3.047 | 2.11E-13 |
| Macrophages | PDGF-BB (complex)               | complex                                    | Inhibited | -3.091 | 2.10E-09 |
| BMSCs       | TP53                            | transcription<br>regulator                 | Activated | 6.96   | 1.65E-41 |
| BMSCs       | NUPR1                           | transcription<br>regulator                 | Activated | 6.78   | 1.56E-17 |
| BMSCs       | IFNG                            | cytokine                                   | Activated | 6.683  | 2.1E-34  |
| BMSCs       | let-7 (includes others)         | microRNA                                   | Activated | 6.655  | 3.04E-15 |
| BMSCs       | IRF3                            | transcription<br>regulator                 | Activated | 6.413  | 2.56E-18 |
| BMSCs       | IFN BETA (family)               | group                                      | Activated | 6.368  | 3.36E-23 |
| BMSCs       | ZBTB10                          | transcription<br>regulator                 | Activated | 6.161  | 2.05E-21 |
| BMSCs       | STING1                          | ion channel                                | Activated | 6.122  | 7.37E-19 |
| BMSCs       | IL1B                            | cytokine                                   | Activated | 5.796  | 1.72E-26 |
| BMSCs       | IRF7                            | transcription<br>regulator                 | Activated | 5.768  | 8.95E-12 |
| BMSCs       | STAT1                           | transcription<br>regulator                 | Activated | 5.741  | 4.95E-23 |
| BMSCs       | IFNA2                           | cytokine                                   | Activated | 5.658  | 1.02E-09 |
| BMSCs       | PAFAH1B1                        | enzyme                                     | Activated | 5.591  | 1.75E-19 |
| BMSCs       | IFNB1                           | cytokine                                   | Activated | 5.587  | 1.79E-23 |

|       |                            |                            |           |        |             |
|-------|----------------------------|----------------------------|-----------|--------|-------------|
| BMSCs | IFNAR (family)             | group                      | Activated | 5.421  | 1.83E-14    |
| BMSCs | CDKN2A                     | enzyme                     | Activated | 5.195  | 2.32E-18    |
| BMSCs | IFNAR1                     | transmembrane receptor     | Activated | 5.084  | 1.03E-12    |
| BMSCs | CHUK                       | kinase                     | Activated | 5.006  | 4.44E-16    |
| BMSCs | TNF                        | cytokine                   | Activated | 4.957  | 1.56E-32    |
| BMSCs | CDKN1A                     | kinase                     | Activated | 4.853  | 1.72E-43    |
| BMSCs | TLR4                       | transmembrane receptor     | Activated | 4.754  | 6.36E-12    |
| BMSCs | MAGI1                      | enzyme                     | Activated | 4.743  | 1.07E-16    |
| BMSCs | SMARCB1                    | transcription regulator    | Activated | 4.7    | 1.18E-16    |
| BMSCs | SENP3                      | peptidase                  | Activated | 4.679  | 4.26E-15    |
| BMSCs | INTERFERON ALPHA (family)  | group                      | Activated | 4.665  | 2.83E-23    |
| BMSCs | IL1A                       | cytokine                   | Activated | 4.592  | 1.95E-13    |
| BMSCs | TLR3                       | transmembrane receptor     | Activated | 4.553  | 3.13E-11    |
| BMSCs | IFNA4                      | cytokine                   | Activated | 4.405  | 2.35E-13    |
| BMSCs | IMMUNOGLOBULIN (complex)   | complex                    | Activated | 4.373  | 1.72E-30    |
| BMSCs | IL17A                      | cytokine                   | Activated | 4.349  | 1.03E-12    |
| BMSCs | TLR7                       | transmembrane receptor     | Activated | 4.344  | 4.69E-08    |
| BMSCs | IFN ALPHA/BETA (family)    | group                      | Activated | 4.316  | 6.9E-17     |
| BMSCs | G PROTEIN ALPHA I (family) | group                      | Activated | 4.316  | 2.55E-14    |
| BMSCs | IL27                       | cytokine                   | Activated | 4.31   | 0.000000137 |
| BMSCs | CGAS                       | enzyme                     | Activated | 4.271  | 3.73E-13    |
| BMSCs | STX18                      | transporter                | Inhibited | -3.9   | 0.0000238   |
| BMSCs | USP8                       | peptidase                  | Inhibited | -3.908 | 8.68E-08    |
| BMSCs | IRGM                       | enzyme                     | Inhibited | -3.911 | 0.00000176  |
| BMSCs | TOX                        | transcription regulator    | Inhibited | -3.962 | 9.99E-13    |
| BMSCs | KDM1A                      | enzyme                     | Inhibited | -3.996 | 2.31E-30    |
| BMSCs | Scd2                       | enzyme                     | Inhibited | -4.021 | 1.61E-13    |
| BMSCs | AREG                       | growth factor              | Inhibited | -4.069 | 4.62E-20    |
| BMSCs | E2F1                       | transcription regulator    | Inhibited | -4.123 | 2.52E-20    |
| BMSCs | PTGER2                     | G-protein coupled receptor | Inhibited | -4.148 | 5.12E-25    |
| BMSCs | MYC                        | transcription regulator    | Inhibited | -4.303 | 2.18E-17    |
| BMSCs | IRF2BP2                    | transcription regulator    | Inhibited | -4.323 | 4.64E-13    |
| BMSCs | ERBB2                      | kinase                     | Inhibited | -4.332 | 2.98E-32    |
| BMSCs | BMI1                       | transcription              | Inhibited | -4.398 | 1.78E-10    |

|       |              |                                      |           |        |          |
|-------|--------------|--------------------------------------|-----------|--------|----------|
|       |              | regulator                            |           |        |          |
| BMSCs | EP400        | other                                | Inhibited | -4.423 | 2.02E-14 |
| BMSCs | CD3E         | transmembrane<br>receptor            | Inhibited | -4.506 | 1.88E-12 |
| BMSCs | NFAT5        | transcription<br>regulator           | Inhibited | -4.533 | 1.17E-18 |
| BMSCs | F3           | transmembrane<br>receptor            | Inhibited | -4.533 | 4.29E-14 |
| BMSCs | PCLAF        | other                                | Inhibited | -4.698 | 3.66E-22 |
| BMSCs | PNPT1        | enzyme                               | Inhibited | -4.772 | 3.22E-16 |
| BMSCs | TRIM24       | transcription<br>regulator           | Inhibited | -4.781 | 4.36E-11 |
| BMSCs | RNASEH2B     | other                                | Inhibited | -4.886 | 1.54E-11 |
| BMSCs | E2F (family) | group                                | Inhibited | -4.973 | 1.53E-29 |
| BMSCs | TREX1        | enzyme                               | Inhibited | -5.026 | 2.22E-21 |
| BMSCs | STAT6        | transcription<br>regulator           | Inhibited | -5.083 | 8.08E-34 |
| BMSCs | SOCS1        | other                                | Inhibited | -5.122 | 5.87E-13 |
| BMSCs | FOXM1        | transcription<br>regulator           | Inhibited | -5.249 | 1.56E-25 |
| BMSCs | TTC39A-AS1   | other                                | Inhibited | -5.251 | 1.3E-17  |
| BMSCs | TBX2         | transcription<br>regulator           | Inhibited | -5.787 | 6.73E-26 |
| BMSCs | TBX3         | transcription<br>regulator           | Inhibited | -6.115 | 1E-48    |
| BMSCs | CKAP2L       | other                                | Inhibited | -6.164 | 9.81E-36 |
| BMSCs | RABL6        | other                                | Inhibited | -6.164 | 2.59E-30 |
| BMSCs | TFEB         | transcription<br>regulator           | Inhibited | -6.294 | 3.91E-22 |
| BMSCs | CITED2       | transcription<br>regulator           | Inhibited | -6.68  | 1.86E-23 |
| BMSCs | Eldr         | other                                | Inhibited | -7.04  | 5.62E-55 |
| BMSCs | PPARD        | ligand-dependent<br>nuclear receptor | Inhibited | -7.7   | 7.37E-49 |

## References

1. Sanborn, M.A., Wang, X., Gao, S., Dai, Y. & Rehman, J. Unveiling the cell-type-specific landscape of cellular senescence through single-cell transcriptomics using SenePy. *Nat Commun* **16**, 1884 (2025).
2. Saul, D., *et al.* A new gene set identifies senescent cells and predicts senescence-associated pathways across tissues. *Nat Commun* **13**, 4827 (2022).
